# Supplementary material for: The genetic origin and architecture of sex determination
Source: bioRxiv preprint, doi:10.1101/2021.12.06.471508, version 1 (2021-12-07)
Supplement: Supplementary table 1 [file 471508_file07.xlsx]

## Sheet: PRIMATES
Primates	SAT1	NR0B1	SAT2	SHBG	DMRT1
Colobus angolensis palliatus	NW_012114489.1:1751142-1754190	NW_012118488.1:138377-142150	NW_012118154.1:3693584-3695212	NW_012118154.1:3677014-3702748	NW_012117588.1:1021462-1170267
Rhinopithecus bieti	NW_016804407v1:134-3277	NW_016810603v1:49498-54640	NW_016814433v1:3109324-3110976	NW_016814433v1:3112140-3118039	NW_016803417v1:4396127-4474724
Saimiri boliviensis boliviensis	NW_024100929.1:58877970-58881097	NW_024100929.1:52441316-52446507	NW_024100930.1:7105398-7107041	NW_024100930.1:7109693-7112336	NW_024100943.1:18063401-18182937
Pan troglodytes	chrX:23742529-23745675	chrX:30244748-30249748	chr17:7321568-7323210	chr17:7321568-7323210	chr9:752783-837159
Propithecus coquereli	NW_012150841v1:5312400-5316446	NW_012137414v1:1172471-1177290	NW_012150641v1:1901700-1903207	NW_012150641v1:1897580-1899912	NW_012141191v1:5419335-5524369
Macaca fascicularis	chrX:21738200-21741351	chrX:28434111-28440308	chr16:7701403-7703066	chr16:7708297-7711640	chr15:78190533-78319630
Mandrillus leucophaeus	NW_012103377v1:1306293-1309350	NW_012110519v1:559479-563466	NW_012104920v1:1202296-1203935	NW_012104920v1:1196708-1219145	NW_012110141v1:998239-1142877
Trachypithecus francoisi	NW_022681445.1:1872756-1875873	NW_022681471.1:107650937-107656105	NW_022681466.1:64708842-64710515	NW_022681466.1:64701417-64704046	NW_022681461.1:30252550-30383619
Theropithecus gelada	chrX:45589005-45592072	chrX:52290690-52296450	chr16:63908224-63909881	chr16:63895032-63915468	chr15:80904346-81030400
Rhinopithecus roxellana	chr7:89813412-89816570	chr7:1118879-1123816	chr19:69857078-69858723	chr19:69860556-69866297	chr16:51971702-52099971
Microcebus murinus	chrX:109978852-109982044	chrX:116442217-116447083	chr16:55412458-55414001	chr16:55407610-55411497	chr10:30340462-30450166
Chlorocebus sabaeus	chrX:22231855-22235031	chrX:28707699-28712708	chr16:7001259-7002270	chr16:7002512-7012159	chr12:78551281-78678284
Chlorocebus sabaeus	NW_023666056.1:24126114-24129269	NW_023666056.1:30693186-30698838	NW_023666059.1:14401703-14403354	NW_023666059.1:14395812-14398468	NW_023666038.1:66932184-67066724
Aotus nancymaae	NW_018494005v1:1158112-1161228	NW_018494005v1:7517393-7522520	NW_018503389v1:694033-695675	NW_018503389v1:699770-703058	NW_018499256v1:6837745-6967573
Nomascus leucogenys	chrX:22304328-22307449	chrX:28793520-28798682	chr19:70172479-70174083	chr19:70167045-70169680	chr1a:1481300-1604089
Papio anubis	chrX:121642251-121645414	chrX:115139520-115145855	chr17:7149335-7150967	chr17:7151089-7156624	chr13:29794584-29921357
Cebus imitator	NW_016107842.1:815645-818740	NW_016107597.1:2874812-2880030	NW_016107387.1:6606932-6608006	NW_016107387.1:6600314-6603909	NW_016107985.1:66218-180228
Carlito syrichta	NW_007252785v1:67278-70365	NW_007247763v1:657087-661394	NW_007249784v1:234652-236448	NW_007249784v1:229029-242431	NW_007252935v1:1253093-1374239
Macaca nemestrina	NW_012017243v1:24484017-24487168	NW_012011245v1:5291827-5297483	NW_012010689v1:8344576-8346239	NW_012010689v1:8348117-8353462	NW_012011378v1:2058874-2203017
Pan paniscus	chrX:23757943-23759743	chrX:30459527-30464652	chr17:7643490-7645127	chr17:7647902-7650541	chr9:844366-972656
Pan paniscus	NC_048262.1:16382735-16385790	NC_048262.1:22903403-22908527	NC_048256.1:7657166-7658748	NC_048256.1:7658990-7664328	NC_048248.1:650678-778519
Macaca mulatta	chrX:23581804-23584868	chrX:30168074-30173862	chr16:7405362-7406971	chr16:7410284-7414273	chr15:82878630-83007049
Hylobates moloch	NW_022611649.1:28919639-28922779	NW_022611649.1:35235331-35240510	NW_022611661.1:38650016-38651633	NW_022611661.1:38654307-38657058	NW_022611661.1:77807811-77938954
Otolemur garnettii	NW_003852446v1:9191875-9195324	NW_003852467v1:7291392-7296759	NW_003852441v1:11690070-11691926	NW_003852441v1:11684479-11688285	NW_003852401v1:25697841-25805642
Cercocebus atys	NW_012003945v1:8282106-8285252	NW_012003945v1:1648680-1654748	NW_012000250v1:8302606-8321532	NW_012000250v1:8302606-8321532	NW_012008362v1:20364065-20490099
Pongo abelii	chrX:20369133-20372282	chrX:26991354-26996502	chr17:7473986-7475582	chr17:7475732-7481142	chr9:40300721-40427359
Sapajus apella	NW_022436957.1:19581845-19584938	NW_022436957.1:25854026-25859146	NW_022436952.1:25543765-25545407	NW_022436952.1:25538337-25541702	NW_022436964.1:17232604-17345618
Piliocolobus tephrosceles	chr12:124465742-124468903	chr12:117836960-117842214	chr16:7420831-7441345	chr16:7420831-7441345	chr14:81480444-81607745
Gorilla gorilla gorilla	NC_044625.1:22101280-22103316	NC_044625.1:28623410-28628577			NC_044611.1:38574492-38701136
Callithrix jacchus	NC_048405.1:22842841-22845983	NC_048405.1:29413316-29418432	NC_048387.1:72870731-72872393	NC_048387.1:72874304-72877593	NC_048383.1:105564746-105691155

## Sheet: MAMMALS
SPECIES	SAT1	NR0B1	SAT2	SHBG	DMRT1
Orycteropus afer afer	NW_006922326v1:418740-420984	NW_006922170v1:757711-762830	NW_006921917v1:2797518-2798702	NW_006921917v1:2788635-2795056	NW_006922156v1:857768-997166
Loxodonta africana	NW_003573459v1:7495926-7499482	NW_003573502v1:7090539-7096173		NW_003573467v1:11656535-11660638	NW_003573508v1:4538765-4664727
Vicugna pacos	chrUn_NW_021991991v1:4858767-4861845	chrUn_NW_021991991v1:9976311-9981115	chrUn_NW_022039035v1:522416-524941	chrUn_NW_022039035v1:526046-528807	chr4_NW_021964163v1_random:660354-752418
Marmota marmota marmota	NW_015351231v1:12923566-12926546	NW_015351231v1:18881014-18884403	NW_015351302v1:904933-906493	NW_015351302v1:906825-910582	NW_015351242v1:9936905-10039819
Castor canadensis	NW_017871623v1:2948-6039	NW_017869447v1:7895-12035	NW_017869770v1:689052-690795	NW_017869770v1:693108-696111	NW_017877097v1:18052-74318
Bison bison bison	NW_011479180v1:5357-8427	NW_011490526v1:18-1033	NW_011494752v1:15953703-15955375	NW_011494752v1:15949014-15953629	NW_011495030v1:4346248-4441919
Bison bison bison	NW_011479180v1:5357-8429	NW_011490526v1:18-1033
Neovison vison	FNWR01000175.1:406544-409041	FNWR01000360.1:880643-885741	FNWR01000205.1:2423563-2425088	FNWR01000205.1:2426358-2429255	FNWR01000073.1:2445108-2547618
Ochotona princeps	NW_004535465v1:3474104-3476944	NW_004535465v1:8970826-8976031	NW_004535507v1:6412396-6413729	NW_004535507v1:6408195-6411198	NW_004535485v1:13145016-13221835
Ochotona princeps	NW_023426579.1:11618732-11621812	NW_023426579.1:6119545-6124750	NC_050554.1:45179317-45180650	NC_050554.1:45181848-45184851	NC_050559.1:13145016-13221835
Panthera tigris altaica	NW_006711960v1:3034246-3037823	NW_006711896v1:4445692-4449310	NW_006712066v1:383399-385465	NW_006712066v1:379330-382361	NW_006711786v1:554389-671151
Camelus dromedarius	chrX:102859041-102862115	chrX:97133943-97138737	chr16:8031816-8034334	chr16:8027927-8030264	chr4:22394973-22487652
Urocitellus parryii	NW_020540132v1:2275143-2278166	NW_020540161v1:33845-37322	NW_020539965v1:523247-524798	NW_020539965v1:525932-529077	NW_020540463v1:481565-584067
Equus asinus	NW_014638400v1:438223-441265	NW_014637898v1:1560869-1565853	NW_014638249v1:975555-977970	NW_014638249v1:979217-982074	NW_014637982v1:1646794-1748912
Tachyglossus aculeatus	NC_052080.1:3114561-3120738		NC_052096.1:3187238-3194290		NC_052098.1:15063373-15173617
Camelus bactrianus	NW_011517570v1:2164792-2167844	NW_011510995v1:5451660-5456285	NW_011516271v1:512809-514584	NW_011516271v1:515652-518455	NW_011516728v1:3296544-3353445
Delphinapterus leucas)	NW_022098033v1:8367835-8370885	NW_022098081v1:30730-35688	NW_022098035v1:10971979-10975009	NW_022098035v1:10976380-10981645	NW_022098042v1:24966363-25072187
Eptesicus fuscus	NW_007371060v1:102084-105001	NW_007370763v1:3543818-3549201	NW_007370741v1:4585338-4587051	NW_007370741v1:4581184-4585041	NW_007370679v1:1239607-1303989
Pteropus alecto	NW_006435837v1:366760-369769	NW_006441067v1:39204-44066	NW_006442497v1:3546218-3547682	NW_006442497v1:3548384-3551551	NW_006441071v1:15523262-15614100
Rattus rattus	NC_046172.1:37212294-37215478	NC_046172.1:47318956-47323073	NC_046162.1:49233423-49235553	NC_046162.1:49225821-49229053	NC_046155.1:25608334-25704934
Myotis brandtii	NW_005355666v1:138754-141875	NW_005371386v1:56232-60975	NW_005370145v1:601615-603612	NW_005370145v1:604714-625664	NW_005366833v1:3425208-3486717
Ursus arctos horribilis	NW_020656186v1:2762546-2765609	NW_020656155v1:2881876-2886635	NW_020656175v1:2352735-2354395	NW_020656175v1:2355241-2358734	NW_020656170v1:9428513-9529490
Zalophus californianus	NW_020874514v1:19412559-19415640	NW_020874514v1:25354866-25359667	NW_020875730v1:57199541-57202160	NW_020875730v1:57195490-57198951	NW_020874788v1:9963671-10069861
Lynx canadensis	chrX:19573496-19576631	chrX:25508874-25514327	chrE1:2407305-2409472	chrE1:2410382-2414404	chrD4:10099908-10211823
Elephantulus edwardii	NW_006399790v1:1101548-1104735	NW_006399790v1:9442091-9445645	NW_006399996v1:2393469-2394605	NW_006399996v1:2401449-2412990	NW_006399764v1:30412415-30516025
Chrysochloris asiatica	NW_006408536v1:9500117-9503280	NW_006408536v1:691882-697449	NW_006408572v1:9322375-9323519	NW_006408572v1:9325934-9337203	NW_006408574v1:6060660-6180748
Bos taurus	chrX:119431931-119434979	chrX:113283185-113289019	chr19:27344312-27345950	chr19:27345934-27350673	chr8:43600802-43697202
Acinonyx jubatus	NW_020836475v1:12663048-12666180	NW_020836475v1:18490876-18496567	NW_020834802v1:2386701-2389189	NW_020834802v1:2389349-2391131	NW_020834778v1:11160694-11272321
Cricetulus griseus	NW_003615133v1:209473-211898	NW_003614449v1:540284-544669	NW_003613643v1:1677145-1679130	NW_003613643v1:1668942-1672687	NW_003616919v1:39419-85807
Cricetulus griseus	NC_048604.1:90683260-90685923	NC_048604.1:82192744-82196526	NC_048600.1:83467402-83469012	NC_048600.1:83459010-83462722	NC_048596.1:35699935-35803672
Manis pentadactyla	NW_023455343.1:3230017-3233010	NW_023455698.1:2742804-2747863	NW_023458232.1:4340631-4342991	NW_023458232.1:4343635-4346890	NW_023456762.1:3872251-3963401
Tupaia chinensis	NW_006159659v1:4459785-4461695	NW_006160117v1:6228636-6237928	NW_006159824v1:909636-911043	NW_006159824v1:903320-907743	NW_006159849v1:5336236-5431103
Tursiops truncatus	NW_017842689v1:4724839-4727883	NW_017842341v1:1400841-1405742	NW_017843806v1:90451-93426		NW_017843160v1:45049578-45148759
Desmodus rotundus	NW_020093379v1:4587606-4590318	NW_020091171v1:4210516-4215709	NW_020092766v1:11315882-11317443	NW_020092766v1:11319537-11321763	NW_020090403v1:3681986-3776887
Vombatus ursinus	NW_020954740v1:92039-95841	NW_020944646v1:623181-626324	NW_020951694v1:1323558-1326538	NW_020951694v1:1327881-1332402	NW_020954610v1:41620259-41760310
Fukomys damarensis	NW_011046696v1:3341772-3344750	NW_011046933v1:106906-116178	NW_011047914v1:526507-528029	NW_011047914v1:529448-532940	NW_011045786v1:2372521-2493990
Fukomys damarensis	NW_022900951.1:19704780-19707778	NW_022900951.1:25858888-25868160	NW_022900925.1:9902352-9903954	NW_022900925.1:9897520-9901013	NW_022900943.1:16431065-16538259
Myotis davidii	NW_006291016v1:137217-140206	NW_006285716v1:206847-213463	NW_006289395v1:468354-470162	NW_006289395v1:471192-474390	NW_006291965v1:4131870-4224149
Octodon degus	NW_004524617v1:13867161-13869554	NW_004524617v1:4421187-4426268	NW_004524674v1:5235107-5236672	NW_004524674v1:5237837-5242785	NW_004524663v1:6106969-6224312
Canis lupus dingo	NW_023365275.1:19429027-19432047	NW_023365275.1:25392939-25397535	NW_023365093.1:32765751-32767473	NW_023365093.1:32767618-32772067	NW_023365038.1:90316160-90429681
Canis lupus familiaris	chrX:19461945-19464209	chrX:25396527-25401345	chr5:32534302-32536022	chr5:32536170-32540627	chr1:89677556-89790692
Canis lupus familiaris		NC_006621.4:30371408-30375977	NC_006587.4:32673484-32675206	NC_006587.4:32675350-32679801	NC_006583.4:90147169-90258242
Canis lupus familiaris	NC_051843.1:19416189-19419200	NC_051843.1:25418991-25424263	NC_051809.1:32639324-32641046	NC_051809.1:32640395-32645639	NC_051805.1:90227678-90339078
Felis catus	chrX:20204990-20208126	chrX:26125426-26131512	chrE1:2514757-2517262	chrE1:2518223-2522038	chrD4:10174104-10286382
Mustela putorius furo	NW_004569286v1:2947120-2950250	NW_004569225v1:5159067-5162713	NW_004569217v1:6587433-6589038	NW_004569217v1:6582936-6586682	NW_004569261v1:5892800-6000062
Cavia porcellus	NT_176360v1:6482873-6485792	NT_176341v1:3514270-3519240	NT_176358v1:9032948-9034443	NT_176358v1:9028579-9032090	NT_176398v1:18914062-19018551
Rousettus aegyptiacus	NW_015492985v1:6004-9000	NW_015493230v1:140078-144885	NW_015493329v1:5514-7526	NW_015494595v1:1730213-1733076	NW_015493188v1:2263183-2354010
Arvicola amphibius	NC_052065.1:1430696-1433359	NC_052065.1:44663620-44667467	NC_052050.1:51373892-51375604	NC_052050.1:51379834-51383500	NC_052047.1:166746879-166840880
Sorex araneus	NW_004545909v1:14157089-14160084	NW_004545911v1:7704184-7709302	NW_004545869v1:21505083-21506657	NW_004545869v1:21497803-21503559	NW_004545856v1:9801156-9903063
Trichechus manatus latirostris	NW_004444036v1:8263961-8267046	NW_004444095v1:70936-75879	NW_004443976v1:11934989-11938783	NW_004443976v1:11927058-11932733
Ailuropoda melanoleuca	NC_048238.1:19879503-19882569	NC_048238.1:25584378-25589084	NC_048234.1:2390663-2392618	NC_048234.1:2392854-2396417	NC_048234.1:23037603-23142508
Capra hircus	chrX_NW_017189516v1_random:46220673-46223754	chrX_NW_017189516v1_random:41975662-41981387	chr19:27082720-27084322	chr19:27084442-27089008	chr8:43431924-43524043
Mesocricetus auratus	NW_004801682v1:1732761-1735279	NW_004801700v1:3753666-3757373	NW_004801614v1:7524115-7526261		NW_004801604v1:33188844-33292917
Halichoerus grypus	NW_023398671.1:38570-41686	NW_023399906.1:11029-16110	NW_023401300.1:806524-808100	NW_023401300.1:809082-812695	NW_023403949.1:516537-621868
Monodelphis domestica)	chr4:43049037-43052810	chr4:34953668-34957915	chr2:254920249-254923852	chr2:254915049-254918110	chr6:99635167-99724666
Hipposideros armiger	NW_017732032v1:507970-511406	NW_017732171v1:728977-733413	NW_017731781v1:70518-72354	NW_017731781v1:62162-68844	NW_017731445v1:3603596-3718829
Myotis myotis	NW_023416346.1:118094150-118097295	NW_023416346.1:112249504-112254544	NW_023416321.1:40285307-40286925	NW_023416321.1:40287125-40291402	NW_023416316.1:43723602-43822148
Phoca vitulina	NW_022589758.1:9559468-9720397	NW_022589738.1:4001028-4005615	NW_022589750.1:2441975-2444851	NW_022589750.1:2446159-2449397	NW_022589740.1:8189512-8294149
Neomonachus schauinslandi)	chrX_NW_018726535v1_random:1784519-1787657	chrX_NW_018726535v1_random:7823799-7828054	chrUn_NW_018734354v1:10461711-10463179	chrUn_NW_018734354v1:10457054-10460254	chrUn_NW_018734353v1:6664851-6768871
Sturnira hondurensis	NW_023511491.1:386737-389606	NW_023512944.1:214381-220500	NW_023526997.1:4962955-4964590	NW_023526997.1:4956642-4961096	NW_023520286.1:4568020-4665521
Equus caballus	chrX:19065511-19068552	chrX:24727817-24732548	chr11:50927202-50929620	chr11:50929723-50933572	chr23:22269232-22370692
Mus musculus	NC_000086.8:153996122-153999445	NC_000086.8:85235381-85239553	NC_000077.7:69512826-69514857	NC_000077.7:69501108-69508852	NC_000085.7:25483070-25581692
Talpa occidentalis	NW_023601543.1:76387035-76390048	NW_023601543.1:71445123-71449339	NW_023605083.1:91651423-91652900	NW_023605083.1:91654207-91658503	NW_023605083.1:26316592-26412392
Pteropus giganteus	NW_024354498.1:323800-326773	NW_024347864.1:25073-30106	NW_024352783.1:492827-494476	NW_024352783.1:494956-498123	NW_024340692.1:15138770-15229152
Puma yagouaroundi	NW_024420586.1:2401213-2404358	NW_024420586.1:8521921-8527623	NW_024412439.1:10336994-10339493	NW_024412439.1:10331363-10335173	NW_024412430.1:12874769-12988828
Artibeus jamaicensis	NW_023546521.1:1163316-1166063	NW_023577420.1:3908247-3915949	NW_023556356.1:110214-113177	NW_023556356.1:113293-117763	NW_023572818.1:232398-329286
Orcinus orca	NW_004438588v1:3897543-3900191	NW_004438552v1:2934139-2939027	NW_004438434v1:11273078-11289388	NW_004438434v1:11273078-11289388	NW_004438494v1:8704771-8809222
Phascolarctos cinereus	NW_018343988v1:12672414-12676176	NW_018343988v1:5309009-5315619	NW_018344119v1:5600323-5603063	NW_018344119v1:5594614-5634031	NW_018344044v1:4899678-5048048
Pteropus vampyrus	NW_011889120v1:1867387-1870383	NW_011889495v1:650097-654806	NW_011888825v1:314301-315946	NW_011888825v1:307597-319601	NW_011889135v1:666102-759293
Panthera pardus	NW_017619998v1:2249955-2253085	NW_017619923v1:5644598-5651145	NW_017619906v1:11502981-11505895	NW_017619906v1:11496376-11499527	NW_017619887v1:11948476-12065469
Jaculus jaculus	NW_004504453v1:2848696-2851800	NW_004504377v1:5217253-5220736	NW_004504440v1:5583801-5584938	NW_004504440v1:5573880-5580217	NW_004504322v1:32577102-32691632
Myotis lucifugus	NW_005871068v1:2282056-2285205	NW_005871068v1:7684926-7689981		NW_005872511v1:55-4479	NW_005871608v1:459046-552141
Globicephala melas	NW_022134983v1:4961320-4964359	NW_022134990v1:3679608-3684323	NW_022134874v1:8662752-8665254	NW_022134874v1:8657141-8661838	NW_022134904v1:12990562-13097518
Chinchilla lanigera	NW_004955509v1:4199533-4202103	NW_004955531v1:567491-572329	NW_004955467v1:9306210-9308668	NW_004955467v1:9301173-9305009	NW_004955434v1:5341520-5448049
Manis javanica	NW_016530109v1:127488-130491	NW_016540211v1:145373-150653	NW_016539190v1:224089-226694	NW_016539190v1:220167-223410	NW_016541251v1:166471-260062
Manis javanica	NW_023436113.1:447962-450956	NW_023436135.1:8493227-8498339	NW_023436117.1:5215919-5217321	NW_023436117.1:5217971-5221243	NW_023436132.1:18121607-18217518
Suricata suricatta	chrX:18544258-18547263	chrX:24174397-24180165	chr17:2185348-2186882	chr17:2189189-2192851	chr13:81055275-81157266
Balaenoptera acutorostrata scammoni	NW_006728031v1:423940-426672	NW_006726143v1:527880-532737	NW_006725366v1:2283444-2286300	NW_006725366v1:2082551-2087022	NW_006727131v1:4952415-5058658
Meriones unguiculatus	NW_018668604v1:16341-19593	NW_018669715v1:14404-19118	NW_018658377v1:295597-297864	NW_018658377v1:289737-292395	NW_018657787v1:1260189-1360862
Heterocephalus glaber)	NW_004624897v1:176414-179318	NW_004624762v1:25759976-25769543	NW_004624786v1:10232078-10233602	NW_004624786v1:10234486-10239034	NW_004624736v1:5525417-5641612
Monodon monoceros	NW_021703779v1:20812389-20815441	NW_021703779v1:26681365-26686327	NW_021703786v1:46227006-46229298	NW_021703786v1:46221426-46238377	NW_021703782v1:61948902-62053629
Miniopterus natalensis	NW_015504605v1:805942-808481	NW_015504865v1:129987-134710	NW_015504925v1:378142-379549	NW_015504925v1:381414-384528
Dasypus novemcinctus	NW_004464639v1:171146-174143	NW_004483492v1:4268439-4272930	NW_004482888v1:270791-272365	NW_004482888v1:272460-276061	NW_004480363v1:304236-415125
Lontra canadensis)	NW_022631121.1:1332113-1335171	NW_022631145.1:2753675-2758482	NW_022631104.1:2411940-2413253	NW_022631104.1:2414361-2417612	NW_022631025.1:8492809-8592806
Callorhinus ursinus	NW_020313078v1:24379106-24382188	NW_020313078v1:18336912-18341641	NW_020313450v1:2585734-2588289	NW_020313450v1:2589844-2593083	NW_020312968v1:11328759-11432964
Rattus norvegicus	NC_051356.1:40158446-40161641	NC_051356.1:50756886-50761014	NC_051345.1:54340756-54343507	NC_051345.1:54332939-54350281	NC_051336.1:223142859-223241333
Dipodomys ordii	NW_012267310v1:3905773-3908141	NW_012267310v1:8761741-8764476	NW_012267235v1:11841598-11843807	NW_012267235v1:11834773-11838877	NW_012267256v1:11491440-11590257
Odobenus rosmarus divergens	NW_004450730v1:916917-920003	NW_004451850v1:36609-41350	NW_004450351v1:2352598-2353783	NW_004450351v1:2348015-2350969	NW_004451381v1:489215-593172
Lagenorhynchus obliquidens	NW_020838051v1:2323433-2326471	NW_020838042v1:34403-39293	NW_020837982v1:10767724-10770849	NW_020837982v1:10771638-10776334	NW_020837951v1:51298594-51404482
Phyllostomus discolor	chr9:71179842-71182753	chr9:76184936-76191100	chr8_NW_021126250v1_random:5292298-5293498	chr8_NW_021126250v1_random:5287766-5290689	chr1:176796750-176897979
Molossus molossus	NW_023425355.1:131124277-131127448	NW_023425355.1:124678445-124683028	NW_023425354.1:48157439-48159529	NW_023425354.1:48160309-48163651	NW_023425349.1:53080014-53176899
Sus scrofa)	chrX:19908037-19910553	chrX:26117874-26122951	chr12:52911725-52913314	chr12:52914711-52919092	chr1:220841485-220953442
Sus scrofa)	NPJO01000536.1:38823-41831	CM009104.1:26588326-26593458	CM009097.1:52088414-52090052	CM009097.1:52088414-52089475	CM009086.1:61272577-61384713
Ornithorhynchus anatinus	NC_041742.1:15577535-15582589	NC_041742.1:13862402-13864952	NC_041753.1:6836011-6840614	NC_041753.1:6821938-6830500	NC_041753.1:55353945-55456377
Ursus maritimus	NW_007907150v1:6758898-6761571		NW_007907088v1:2373764-2374645	NW_007907088v1:2376492-2379650	NW_007907118v1:9418616-9519364
Peromyscus maniculatus bairdii	NW_006501065v1:12250912-12254190	NW_006501372v1:2848487-3766112	NW_006501067v1:775927-777907	NW_006501067v1:782989-786571	NW_006501127v1:1414535-1545301
Microtus ochrogaster	chrX:54144933-54148136	chrUn_NW_004949156v1:2356804-2360709	chr7:29158702-29160621	chr7:29167665-29171824	chr8:54912592-55002109
Equus przewalskii	NW_007680678v1:6-2387	NW_007675521v1:213467-218355	NW_007674540v1:78525-80821	NW_007674540v1:74097-77393
Puma concolor	NW_020340091v1:1334241-1337391	NW_020340091v1:7536215-7540835	NW_020339219v1:2221392-2229545	NW_020339219v1:2231705-2238078	NW_020339908v1:10399560-10508730
Oryctolagus cuniculus	chrX:9714960-9717971	chrX:16343016-16348245	chr19:11563963-11565433	chr19:11560507-11563050	chr1:53687574-53804172
Ovis aries	chrX:23467909-23470995	chrX:31338148-31343660	chr11:36079941-36081554	chr11:36075168-36079826	chr2:74399949-74492147
Vulpes vulpes	NW_020356459v1:12155174-12158334	NW_020356459v1:6187501-6192301	NW_020356487v1:2260870-2262565	NW_020356487v1:2262645-2267162	NW_020356472v1:11126703-11240981
Mus caroli	chrX:143962810-143966106	chrX:81249995-81254182	chr11:64358248-64360059	chr11:64351029-64354109	chr19:22634946-22735084
Oryx dammah	NW_024070207.1:110704125-110707221	NW_024070207.1:104305089-104310606	NW_024070192.1:34880513-34885390	NW_024070192.1:34880513-34885123	NW_024070185.1:42946961-43038950
Enhydra lutris kenyoni)	NW_019154107v1:5657063-5660141	NW_019154107v1:11780673-11785489	NW_019154166v1:2324930-2326315	NW_019154166v1:2327644-2330627	NW_019154117v1:8939653-9051940
Mus pahari	chrX:133970026-133973330	chrX:73863787-73867958	chr14:37467271-37469133	chr14:37460332-37463239	chr1:137173333-137269170
Echinops telfairi	NW_022103951v1:3631322-3633709	NW_022111336v1:2331752-2334403	NW_022105908v1:19916560-19917757		NW_022103922v1:3988433-3994937
Mirounga leonina	NW_023270158.1:9365841-9368953	NW_023270158.1:15302570-15307266	NW_023270777.1:2365567-2368804	NW_023270777.1:2369607-2372798	NW_023270615.1:11211327-11317700
Mastomys coucha	chrX:148635163-148638496	chrX:87622881-87627317	chrUn_NW_022196911v1:64882040-64884048	chrUn_NW_022196911v1:64874806-64878089	chrUn_NW_022196904v1:156801148-156905559
Ceratotherium simum simum	NW_004454207v1:12420214-12423312	NW_004454206v1:18047422-18050947	NW_004454199v1:10784773-10786381	NW_004454199v1:10780841-10783320	NW_004454249v1:3938041-4043163
Physeter catodon	chr21:7775280-7780191	chr21:14076293-14081276	chrUn_NW_021145900v1:6088-9075	chrUn_NW_021145900v1:443-4925	chr9:44056305-44164446
Condylura cristata	NW_004567128v1:10479216-10482203	NW_004567128v1:14991678-14996094	NW_004567118v1:29050272-29052261	NW_004567118v1:29045933-29048703	NW_004567107v1:39830241-39922789
Eumetopias jubatus	NW_020998717v1:5700211-5703289	NW_020998762v1:3613077-3617816	NW_020998736v1:3492955-3494158	NW_020998736v1:3488375-3491327	NW_020998688v1:2430098-2534444
Hyaena hyaena	NW_024081805.1:424560-427532	NW_024080949.1:2044553-2050613	NW_024080689.1:3949098-3951563	NW_024080689.1:3944121-3948104	NW_024080683.1:244275-356804
Galeopterus variegatus	NW_007728143v1:102746-105749	NW_007726920v1:48824-54160	NW_007727081v1:37152-38636	NW_007727081v1:32740-35586	NW_007728706v1:149776-251628
Sarcophilus harrisii)	chr3:269663321-269667216	chr3:262833513-262837113	chr4:289713702-289716119	chr4:289718770-289720876	chr1:294326094-294471544
Ictidomys tridecemlineatus	NC_053502.1:12398941-12401062	NC_053502.1:18343850-18347995	NW_024405602.1:47417192-47418750	NW_024405602.1:47419272-47423061	NW_024404947.1:137123846-137229034
Nannospalax galili	NW_008359081v1:327011-330220	NW_008359081v1:8012558-8016037	NW_008357929v1:8421483-8423095	NW_008357929v1:8413286-8416472	NW_008345602v1:4476147-4591191
Bubalus bubalis	chrX:21931011-21934062	chrX:29139277-29148127	chr3:36049576-36051036	chr3:36044713-36049303	chr3:106425495-106520835
Leptonychotes weddellii	NW_006384563v1:605199-608306	NW_006383599v1:1006478-1035571	NW_006384039v1:359898-362063	NW_006384039v1:355883-359499	NW_006387092v1:45501-88416
Erinaceus europaeus	NW_006804621v1:673175-676211	NW_006804014v1:2700786-2706664	NW_006803932v1:5746236-5748428	NW_006803932v1:5751025-5760108	NW_006804305v1:2067964-2156785
Peromyscus leucopus	NC_051083.1:38250239-38253528	NC_051083.1:47647686-47651984	NC_051086.1:52555363-52557439	NC_051086.1:52546709-52551617	NC_051063.1:19311687-19423765
Odocoileus virginianus texanus	NW_018335476v1:668026-671118	NW_018338098v1:195511-200843	NW_018337565v1:1038010-1039646	NW_018337565v1:1033353-1037972	NW_018334763v1:309504-403877
Camelus ferus	NC_045732.1:23041834-23044906	NC_045732.1:28609959-28614712	NC_045711.1:12053974-12056494	NC_045711.1:12058083-12060382	NC_045699.1:32731764-32824426
Camelus ferus	NW_006212474v1:109923-112508	NW_006212013v1:202883-207415	NW_006210406v1:525020-526797	NW_006210406v1:527862-530701	NW_006212032v1:572134-674336
Mus spretus (mouse, rat)	LVXV01027664.1:1443-2010	CM004104.1:68481145-68493029	CM004105.1:69519465-69521281	CM004105.1:69512274-69515414	CM004113.1:22638459-22755138
Bos mutus	NW_005394788v1:611887-614975	NW_005394143v1:668194-673798	NW_005393612v1:60630-62266	NW_005393612v1:62449-66986	NW_005394175v1:1253597-1349367
Grammomys surdaster	NW_021604868v1:552334-555626	NW_021604606v1:2461250-2465540	NW_021604783v1:3243889-3245695	NW_021604783v1:3237963-3241197	NW_021604599v1:6904677-6978928
Neophocaena asiaeorientalis asiaeorientalis	NW_020172874v1:32-2693	NW_020173041v1:682956-688043	NW_020173671v1:182455-184643	NW_020173671v1:186514-190934	NW_020185324v1:1708495-1811458
Lipotes vexillifer	NW_006790779v1:453130-456411	NW_006784469v1:2768005-2773117	NW_006785619v1:986496-988140	NW_006785619v1:989231-993658	NW_006793764v1:1417454-1521412
Marmota flaviventris	NW_023144642.1:12647783-12650816	NW_023144642.1:18642740-18646557	NW_023144813.1:659799-661328	NW_023144813.1:662484-665438	NW_023144703.1:8719036-8822568
Bos indicus	chrX:73468695-73471756		chr19:27847738-27849407	chr19:27849489-27854100	chr8:45753262-45810804

## Sheet: VGP
SPECIES	SAT1	NR0B1	SAT2	SHBG	DMRT1
Bucorvus abyssinicus	chr7:31856417-31859400				chrZ:28461810-28519829
Phoenicopterus ruber ruber	chr1:132182102-132185077	chr1:129379448-129382028			chrZ:30077662-30141567
Calypte anna	chr1:119634839-119637652	chr1:117268043-117270259			chrZ:48427483-48484196
Scleropages formosus	chr24:21228847-21230919	chr1:22685414-22687138	chr13:28932199-28935156	chr13:28851906-28855173	chr6:20640155-20658744
Gadus morhua	chr23:6162649-6165678	chr20:15117679-15119553	chr7:12575524-12584201	chr17:4886730-4892363	chr6:6413367-6436602
Hippoglossus hippoglossus	NC_047164.1:13508888-13511111	NC_047171.1:17528565-17530751	NC_047164.1:14792003-14795359	NC_047168.1:10557124-10561000	NC_047159.1:1916535-1937714
Tachyglossus aculeatus	NC_052080.1:3114561-3120738		NC_052096.1:3187238-3194290		NC_052098.1:15063373-15173617
Hirundo rustica	NC_053451.1:105601098-105603880	NC_053451.1:108055418-108057953			NC_053488.1:3501750-3566047
Sylvia atricapilla	chr2:102097201-102099831	chr2:104460663-104463274			chrZ:84967413-85032222
Balaenoptera musculus	NC_045806.1:19931852-19934874	NC_045806.1:26891465-26896493	NC_045804.1:50917539-50920809	NC_045804.1:50916070-50920809	NC_045790.1:64517965-64622982
Gouania willdenowi	chr14:4041287-4043829	chr21:20647300-20649838	chr18:8038737-8046167	chr18:9716633-9721966	chr9:12449107-12482089
Zalophus californianus	NC_045612.1:109602155-109605237	NC_045612.1:103645182-103649982	NC_045610.1:2633316-2635268	NC_045610.1:2635861-2639314	NC_045607.1:85172606-85278836
Lynx canadensis	NC_044321.2:19573496-19576631	NC_044321.2:25508874-25514327	NC_044316.2:2407305-2409472	NC_044316.2:2410382-2414404	NC_044315.2:10099908-10211823
Merops nubicus	chr3:47867929-47870829	chr3:45028900-45030896			chrZ:28062181-28503533
Cottoperca gobio	chrUn_NW_021166819v1:152996-156728	chr21:20787618-20815819	chr14:9682629-9688088	chr18:9720521-9726747	chr9:22782040-22813518
Anabas testudineus	chr2:17067561-17070810	chr21:9110049-9111792	chr14:8013522-8016984	chr18:17572721-17577255	chr9:21440838-21464822
Trichosurus vulpecula	NC_050574.1:451969161-451972967	NC_050574.1:443839942-443843111	NC_050579.1:260800677-260802805	NC_050579.1:260795735-260798822	NC_050581.1:38212231-38356966
Sterna hirundo	chr1:131295218-131298092				chrZ:55898078-55958502
Geothlypis trichas	chr2:103056351-103059076	chr2:105415793-105418406			chrZ:25896296-25953490
/Bufo bufo	NC_053391.1:137558191-137565854	NC_053391.1:154993662-154999205		NC_053392.1:120303876-120318778	NC_053390.1:353914638-354121002
Denticeps clupeoides	chr2:32997510-32999360	chr5:15071726-15074190	chr1:36863818-36866425	chr1:36997565-37001880	chrUn_NW_021630114v1:131996-138585
Balearica regulorum gibbericeps	chr1:130671751-130674547	chr1:127880561-127883132			chrZ:57604295-57664926
Astatotilapia calliptera	chr9:29263268-29266101	chr16:14003967-14005361	chr10:12501780-12508347	chr3:16969366-16973235	chr12:35356991-35397065
Rousettus aegyptiacus	NW_023416312.1:10561714-10564665	NW_023416312.1:15839583-15844375	NW_023416309.1:73410028-73411612	NW_023416309.1:73405955-73408815	NW_023416306.1:46521384-46612234
Electrophorus electricus	NC_049539.1:9422001-9424408	NC_049555.1:6494579-6497103	NC_049540.1:6872115-6875735	NC_049548.1:12248242-12254040	NC_049543.1:8528075-8544117
Mustela erminea	chrX:19263995-19267048	chrX:25558812-25563684	chr18:2367410-2369031	chr18:2369966-2373124	chr12:84258531-84362690
Sciurus vulgaris)	chrX:118855676-118858463	chrX:112391612-112394343	chr3:54251854-54253421	chr3:54247617-54250714	chr15:20147095-20248961
Arvicola amphibius	NC_052065.1:1430696-1433858	NC_052065.1:44663620-44667467	NC_052050.1:51373892-51375604	NC_052050.1:51379834-51383500	NC_052047.1:166746879-166840880
Rana temporaria	NC_053490.1:428010025-428015371	NC_053490.1:415612985-415619002	NC_053491.1:488634991-488665273	NC_053492.1:112741820-112804085	NC_053489.1:289497647-289680186
Anguilla anguilla	NC_049209.1:17444617-17447765	NC_049215.1:32642370-32644031	NC_049209.1:28789168-28795021	NC_049203.1:57333877-57340180	NC_049214.1:6200525-6213265
Asterias rubens					dmrt5
Streptopelia turtur	chr1:109414328-109417289	chr1:106712508-106715064			chrZ:66132245-66166137
Archocentrus centrarchus	chr20:31894539-31897761	chr21:23610097-23611706	chr14:19926509-19932858	chr18:23205657-23209807	chrUn_NW_022060256v1:5638021-5671543
Geotrypetes seraphini	chr6:238229318-238237478	chr6:259249629-259264187	chr16:33428581-33438746	chr16:35068378-35098920	chr1:476171183-476490964
Sparus aurata	chr19:27563754-27567208	chr9:13878510-13880322	chr13:8954247-8958489	chr10:30021888-30027363	chr5:20183313-20222239
Aquila chrysaetos chrysaetos	chr7:45024631-45027719	chr7:42420052-42422423			chr27:58320216-58383571
Gopherus evgoodei	chr1:144035975-144039552	chr1:148310975-148323250		chrUn_NW_022060107v1:247149-258468	chr6:41963004-42056697
Rhinolophus ferrumequinum	chr1:108101064-108104031	chr1:102310638-102315606	chr21:11263835-11265481	chr21:11259630-11263697	chr12:34686313-34781297
Syngnathus acus	NC_051099.1:7123797-7125106	NC_051105.1:3019154-3021542	NC_051099.1:7710863-7715840	NC_051095.1:997995-1001300	NC_051094.1:4498088-4510407
Myotis myotis	NW_023416346.1:118094150-118097295	NW_023416346.1:112249504-112254544	NW_023416321.1:40285307-40286925	NW_023416321.1:40287109-40291402	NW_023416316.1:43723602-43822148
Chelonia mydas	NC_051241.1:140387677-140391084	NC_051241.1:144385336-144388856		NC_051268.1:6620491-6629475	NC_051246.1:98217331-98302364
Falco rusticolus	NC_051188.1:89160155-89163109	NC_051188.1:86461615-86464383			NC_051210.1:55829661-55892907
Sebastes umbrosus	NC_051289.1:2127997-2135709	NC_051281.1:20951774-20995589	NC_051285.1:27173389-27182345	NC_051290.1:15631871-15637943	NC_051276.1:25522837-25554500
Bos indicus x Bos taurus	chrUn_PUFT02000679v1:179755-182687		chr19:27273690-27275385	chr19:27275143-27280031	chr8:43296875-43392582
	chrX:21687070-21690126	chrX:29515576-29521418	chr19:28384104-28385839	chr19:28385933-28390466	chr8:43398362-43494587
Parambassis ranga	chr20:3332465-3334788	chr21:1575723-1576903	chr18:10547884-10550657	chr18:9125081-9127697	chr9:20532693-20539350
Megalops cyprinoides	NC_050584.1:68738734-68742029	NC_050596.1:4576605-4577802	NC_050585.1:51763527-51767354	NC_050598.1:6230929-6239095	NC_050587.1:6117132-6140433
Salarias fasciatus	chr10:11820348-11822211	chr16:29920992-29941374	chr3:9392695-9396597	chr3:8415512-8418432	chr12:31116873-31126036
Strigops habroptila	chr2:42364167-42367250	chr2:39829630-39832124			chrZ:73968672-74025251
Periophthalmus magnuspinnatus		NC_047146.1:8211715-8213241	NC_047139.1:27771825-27773341	NC_047143.1:26904071-26905874
Pipistrellus kuhlii	NW_023425471.1:9350841-9353766	NW_023425471.1:14732570-14738104	NW_023425522.1:8745269-8746844	NW_023425522.1:8740658-8743432	NW_023425427.1:32130626-32226470
Chiroxiphia lanceolata	chr2:13883603-13886430	chr2:11473934-11476695			chrZ:24023282-24090062
Dermochelys coriacea	NC_050068.1:142740553-142746018	NC_050068.1:146964520-146969287	NC_050095.1:1145108-1148721	NC_050095.1:1651197-1660390	NC_050072.1:101983890-102074933
Echeneis naucrates	chr20:978478-980211	chr21:5487638-5489275	chr18:4059925-4064819	chr18:5472811-5477415	chr9:22391079-22413095
Cyclopterus lumpus	NC_046985.1:4046601-4049867	NC_046986.1:7251560-7254678	NC_046979.1:14337864-14341664	NC_046983.1:8342745-8346765	NC_046974.1:4508160-4528030
Anas platyrhynchos	NC_051772.1:115945811-115948724	NC_051772.1:118483527-118485896			NC_051804.1:28282282-28342659
Chanos chanos	chr3:4859562-4861439	chr4:15441371-15442551	chr15:750943-754916	chr5:37666956-37671520	chr1:45111815-45131215
Cygnus olor	NC_049169.1:125085755-125088618	NC_049169.1:122428333-122430539			NC_049198.1:27856577-27918212
Corvus moneduloides	chr2:110139604-110142342	chr2:112556418-112559268			chrZ:65507850-65565598
Notolabrus celidotus	NC_048276.1:11870166-11871721	NC_048281.1:25621975-25624283	NC_048276.1:13571393-13574774	NC_048294.1:11817011-11822599	NC_048280.1:4869383-4917616
Esox lucius	NC_047575.1:10963407-10965359	NC_047584.1:33514057-33516466	NC_047575.1:4229060-4236639	NC_047592.1:9565205-9572629	NC_047581.1:39139914-39181765
Sphaeramia orbicularis	chr14:28509985-28512008	chr21:31679880-31682090	chr14:26842852-26862672	chr18:33289548-33303888
Phyllostomus discolor	NC_050198.1:10767295-10770105	NC_050198.1:15773391-15778531	NC_040910.2:71084282-71085879	NC_040910.2:71079919-71082840	NC_040905.2:165277323-165379553
Molossus molossus	NW_023425355.1:131124277-131127448	NW_023425355.1:124678445-124683028	NW_023425354.1:48157439-48159529	NW_023425354.1:48160309-48163651	NW_023425349.1:53080014-53176899
Myripristis murdjan	chr20:4885554-4890513	chr21:20645971-20647891	chr18:13253017-13261438	chr18:15193282-15200865	chr9:31586200-31599888
Ornithorhynchus anatinus	NC_041742.1:15577535-15582589	NC_041742.1:13862402-13864952	NC_041753.1:6836011-6840614	NC_041753.1:6821938-6830500	NC_041753.1:55353945-55456377
Thalassophryne amazonica	NC_047111.1:78687611-78691092	NC_047116.1:16310661-16318383	NC_047111.1:84587727-84626926	NC_047125.1:13505554-13514137	NC_047107.1:88175649-88270266
Alca torda	chr1:71720920-71977921	chr1:126519022-126521463			chrZ:29467693-29527867
Pygocentrus nattereri	NC_051234.1:24295985-24299894	NC_051235.1:10034307-10037695	NC_051233.1:116455-127069	NC_051223.1:29971669-29978290	NC_051230.1:19391669-19418751
Tauraco erythrolophus	chr1:46323827-46326761				chrZ:32152126-32212764
Cariama cristata	chr32:1633776-1636726				chrZ:57557023-57622353
Erpetoichthys calabaricus	chr4:45220618-45224636	chr4_NW_021316608v1_random:66944-69969	chr3:273617556-273649969		chr7:149925741-150032214
Salmo trutta	chr6:13242788-13245452	chr24:37649937-37654511	chr7:31366605-31390068	chr13:57518598-57529226	chr27:46326822-46386960
Lacerta agilis	chr4:61433106-61438000	chr4:59341041-59345375	chr14:2576534-2579940	chr14:3868044-3882078	chr16:1043302-1103040
Petromyzon marinus	chrUn_NW_022638266v1:7124-18675		chr3:7397871-7398116
Betta splendens	chr14:8393775-8395253	chr21:6059995-6061264	chr14:7584320-7585997	chr2:23522352-23525743	chr9:28849547-28864704
Pristis pectinata	chr4:62014912-62029153	chr4:78895381-78903200			chr7:65693293-65790530
Onychomys torridus	NC_050466.1:67920220-67922657	NC_050466.1:77056819-77061045	NC_050450.1:57836576-57838675	NC_050450.1:57827550-57833095	NC_050443.1:143922294-144031319
Choloepus didactylus	NC_051334.1:22662474-22665292	NC_051334.1:29405434-29410093	NC_051324.1:10730088-10731652	NC_051324.1:10725683-10729852	NC_051316.1:48864970-48981046
Catharus ustulatus	chr2:111090636-111093341	chr2:113493346-113496657			chrZ:26823163-26879392
Amblyraja radiata	NC_045969.1:28198184-28221240	NC_045969.1:43248981-43257106			NC_045958.1:51219811-51291262
Microcaecilia unicolor	chr4:352009305-352016534	chr4:375317826-375330841	chr14:15598993-15606945	chr14:18004192-18016797	chr2:239531624-239858986
Takifugu rubripes	chr10:11189201-11190776	chr1:16455925-16457541	chr8:16476777-16479331	chr8:17267969-17270641	chr21:16309095-16321547
Aythya fuligula	chr1:124132963-124135857	chr1:121548082-121550098			chrZ:28626259-28687124
Rhinatrema bivittatum	chr5:229069748-229074292	chr5:199596332-199613436	chr16:19755049-19757959	chr16:18248333-18260499	chr1:524136294-524458329
Phocoena sinus	chrX:20357420-20360425	chrX:26580694-26585579	chr20:8786782-8788974	chr20:8781308-8784140	chr6:52152621-52259643
Acanthopagrus latus	NC_051057.1:23023245-23025985	NC_051047.1:10198527-10200285	NC_051051.1:7401242-7407697	NC_051048.1:17892357-17898109	NC_051043.1:16631080-16657561
Thamnophis elegans	chr11:17638923-17644985	chr6:66062477-66066161			chr3:76602172-76682763
Pterocles gutturalis	chr1:19850656-19853611	chr1:17166947-17169486			chrZ:50311901-50378944
Taeniopygia guttata	chr1:100618767-100677022	chr1:102912952-102915294			chrZ:67589254-67651879
Taeniopygia guttata	chr1:102013657-102016423	chr1:104302654-104305149			chrZ:66114185-66176744
Mastacembelus armatus	chrUn_NW_022872938v1:1851407-1855511	chr21:17952612-17954162	chr18:11246382-11253942	chr18:12601994-12607920	chr9:18179634-18202332

## Sheet: Birds
SPECIES	SAT1	NR0B1	SAT2	SHBG	DMRT1	DMRT3	NR0B2
Pygoscelis adeliae	NW_008824468v1:715933-718440	NW_008824196v1:999551-1000074			NW_008825104v1:1397259-1460474
Struthio camelus australis	NW_009270489.1:1005977-1008493	NW_009271895.1:1110600-1111121			NW_009271403.1:768329-799706
Corvus brachyrhynchos	NW_008236965v1:2592641-2595377	NW_008236965v1:177080-179368			NW_008239309v1:2449448-2478883
Calypte anna	chr1:119634786-119637695	chr1:117267967-117270088			chrZ:48427370-48483421
Haliaeetus leucocephalus	NW_010972753v1:2658549-2661594	NW_010972753v1:5151940-5195461			NW_010973285v1:1298490-1359588
Apaloderma vittatum	NW_009715729v1:26-2459	NW_009735646v1:12297-12809			NW_009734064v1:4-55119
Tyto alba	NW_010012000v1:31953-34292	NW_009979666v1:20160-20644			NW_009979478v1:2121-32347
Tyto alba alba	NW_022678977.1:3967138-3969835	NW_022678977.1:6683709-6686315			NW_022663191.1:351083-411676
Hirundo rustica	NC_053451.1:105601098-105603880	NC_053451.1:108055418-108057953			NC_053488.1:3501750-3566047
Lonchura striata domestica	NC_042565.1:13826173-13828996	NC_042565.1:11496725-11499837			NC_042595.1:58190670-58252853
Cygnus atratus	NW_023336595.1:12422532-12425367	NW_023336595.1:15083244-15085321			NW_023336688.1:1079953-1141773
Cyanistes caeruleus	chr1_NW_019776234v1_random:8910856-8913518	chr1_NW_019776234v1_random:11327447-11338838			chrZ_NW_019776556v1_random:12250041-12287339
Lepidothrix coronata	NW_016690315v1:346142-348983	NW_016690405v1:1113795-1116272			NW_016690202v1:4950273-5018147
Molothrus ater	NC_050478.1:26634237-26636962	NC_050478.1:24268246-24270909			NC_050511.1:41755639-41813926
Mesitornis unicolor	NW_010192840v1:59028-61570	NW_010200096v1:1073-1586			NW_010207082v1:24688-35064
Apteryx australis mantelli	NW_013987740.1:15134713-15138913	NW_013988869.1:2058942-2059462			NW_013994137.1:1197427-1257409
Melopsittacus undulatus	NW_004848274v1:19649036-19652060	NW_004848274v1:22242014-22244426
Athene cunicularia	chr1_NW_020799091v1_random:84626563-84629077	chr1_NW_020799091v1_random:87378104-87379744			chrZ_NW_020799145v1_random:1216406-1277079
Merops nubicus	NW_008595710v1:30-2458	NW_008610325v1:4-1719				NW_008603860v1:22497-23657
Gallus gallus	chr1:119746943-119749754	chr1:115748143-115750436			chrZ:25949702-25952032	chrZ:26009162-26016878
Chaetura pelagica	NW_009953449v1:687935-690191	NW_009954442v1:2586409-2586909			NW_009952575v1:301028-355191	NW_009952575v1:369136-378142
Nothoprocta perdicaria	NW_020455371v1:882677-885405	NW_020455743v1:1208641-1210974			NW_020455697v1:8-49037	NW_020455697v1:58023-58979
Antrostomus carolinensis	NW_010332246v1:49592-52084	NW_010333774v1:963-1486			NW_010317249v1:2397-32421	NW_010297164v1:5652-7178
Ficedula albicollis	chr1:14711497-14713977	chr1:12192973-12204548			chrZ:26917481-26978206	chrZ:26983696-26992773
Serinus canaria	NW_022043763v1:14519716-14522449	NW_022043763v1:12177305-12180105			NW_022044521v1:51943961-52001885
Cuculus canorus)	NW_009245030v1:647747-658328	NW_009245030v1:3202354-3205100			NW_009244209v1:1540704-1599585
Sturnus vulgaris	NW_014650572v1:1465561-1468021	NW_014650554v1:886056-888442			NW_014650461v1:8685832-8743550
Nipponia nippon	NW_008998637v1:2050394-2052889	NW_009002846v1:648991-649514			NW_008999665v1:604209-636753
Leptosomus discolor	NW_009845692v1:102-2591	NW_009857532v1:31150-31673			NW_009863778v1:2075-33450
Pelecanus crispus	NW_009081009v1:6945-9441	NW_009094141v1:877-1400			NW_009113452v1:1378-23154
Picoides pubescens	NW_009663786v1:2831188-2834126	NW_009665749v1:608799-611868			NW_009664229v1:518270-574059
Balearica regulorum gibbericeps	NW_010741052.1:68-2574	NW_010764653.1:13308-13831			NW_010733042.1:25656-58521
Aptenodytes forsteri	NW_008795041v1:4385685-4388165	NW_008795695v1:19850841-19851364			NW_008795321v1:1998035-2057303
Dromaius novaehollandiae	NW_020453219v1:59784-62832	NW_020452871v1:1378143-1380830			NW_020452661v1:590939-660264
Passer montanus	NW_024367707.1:4006111-4008822	NW_024367707.1:1674992-1677688			NW_024372147.1:13667080-13726247
Manacus vitellinus	NW_021940813v1:10111441-10114367	NW_021940813v1:7708304-7710781			NW_021939324v1:7890038-7957204
Phalacrocorax carbo	NW_009145754v1:49518-51964	NW_009137011v1:16819-17342			NW_009130836v1:2556-23384
Parus major	chr1:13263994-13266709	chr1:10937210-10939978			chrZ:25569392-25628552
Numida meleagris	chr1:116093315-116096180	chr1:113786602-113788868			chrZ:26425667-26458348
Opisthocomus hoazin	NW_009902617v1:698432-700866	NW_009900065v1:3785604-3786129			NW_009902082v1:210012-265649
Corvus cornix cornix	NC_046332.1:104812677-104815423	NC_046332.1:107215747-107218583			NC_046357.1:64470417-64528267
Coturnix japonica	NC_029516.1:107416125-107418987	NC_029516.1:104367856-104370160			NC_029547.1:23574117-23630495
Strigops habroptila	chr2:23482846-23485876	chr2:20948309-20950803			chrZ:73968672-74025251
Nestor notabilis	NW_009924974v1:51-2540	NW_009935919v1:732-976			NW_009934444v1:7-52885
Charadrius vociferus	NW_009652966v1:1228273-1230700	NW_009647427v1:194878-195402			NW_009648250v1:5711201-5772122
Egretta garzetta	NW_009259184v1:1773552-1776035	NW_009258539v1:5386664-5387018			NW_009260129v1:164339-225463
Chlamydotis macqueenii	NW_010475096v1:13090-15634	NW_010461335v1:51407-51928			NW_010455358v1:2284-31729
Anas platyrhynchos	chr1:88882065-88884917	chr1:86363714-86367263			chrZ:26284643-26341034
Anas platyrhynchos	NC_051772.1:115945811-115948724	NC_051772.1:118483527-118485896			NC_051804.1:28282282-28342659
Geospiza fortis	NW_005054375v1:1471676-1474360	NW_005054540v1:620550-708288			NW_005054462v1:733559-792253
Fulmarus glacialis	NW_009233528v1:52841-55345	NW_009201061v1:1212-1735			NW_009233085v1:26225-36680
Apteryx rowi	NW_020450562v1:566629-569666	NW_020449252v1:477376-479825			NW_020447897v1:589633-646531
Falco peregrinus	NW_004929840v1:1915461-1918318	NW_004929847v1:784272-784781			NW_004930578v1:373676-434386
Tauraco erythrolophus	NW_010048558v1:49413-51901	NW_010079410v1:917-1350			NW_010054668v1:1801-33761
Cariama cristata	NW_009606327v1:5-2593				NW_009322060v1:25715-58261		NW_009606949v1:860-2120
Gavia stellata	NW_009325708v1:10534-13022	NW_009316093v1:34278-34798			NW_009322060v1:25715-58261
Buceros rhinoceros silvestris	NW_010415665.1:8329-10855	NW_010414549.1:20261-20741			NW_010406404.1:1934-30298
Acanthisitta chloris	NW_008677770v1:109-2527	NW_008664292v1:4-2032						NW_008660905v1:1351-2408
Phasianus colchicus	NW_022205435v1:4082864-4085655	NW_022205435v1:1705574-1797488			NW_022207374v1:403592-457104
Columba livia	NW_004973292v1:676815-679866	NW_004973745v1:63247-63769			NW_004973424v1:612271-670941
Oxyura jamaicensis	NC_048893.1:121901368-121903786	NC_048893.1:119366071-119368425			NC_048926.1:28236109-28297418
Calidris pugnax	NW_015091257v1:16645723-16648574	NW_015090895v1:2662114-2664754			NW_015094508v1:2117670-2180296
Neopelma chrysocephalum	NW_020897737v1:5130355-5133204	NW_020897737v1:7545936-7548681			NW_020925458v1:322929-387486
Falco cherrug	NW_004994831v1:4730816-4733819	NW_004994245v1:304057-304571			NW_004994242v1:91170-122792
Camarhynchus parvulus	chr1:13942395-13945214	chr1:11561229-11563680			chrZ:44054208-44111983
Colius striatus	NW_010683878v1:24137-26687	NW_010692185v1:31693-32162			NW_010675298v1:7-21993
Eurypyga helias	NW_010230655v1:29-2384	NW_010260404v1:48605-49128			NW_010252235v1:8919-9227
Anser cygnoides domesticus	NW_013185715.1:4189050-4191339	NW_013185796.1:1371749-1373381			NW_013185788.1:2176485-2251108
Pseudopodoces humilis	NW_005087554v1:71737077-71739870	NW_005087554v1:74065249-74067704			NW_005087568v1:14351778-14411080
Meleagris gallopavo	chr1:117677416-117680261	chr2:59695099-59823595			chrZ:24417125-24470540
Motacilla alba alba	NC_052016.1:111115968-111118715	NC_052016.1:113480782-113483984			NC_052046.1:61783999-61841942
Corapipo altera	NW_020884872v1:13169124-13171957	NW_020884872v1:10771150-10773894			NW_020884875v1:14311211-14371920
Haliaeetus albicilla	NW_009755267v1:19-2631	NW_009790236v1:125603-126117			NW_009775903v1:19832-20002
Phaethon lepturus	NW_010530020v1:43904-46251	NW_010519585v1:27505-28027			NW_010548909v1:2438-33459
Zonotrichia albicollis	NW_005081556v1:3415568-3418055	NW_005081556v1:5768750-5771758			NW_005081599v1:1278796-1332548
Tinamus guttatus	NW_010581628v1:60252-62616	NW_010587558v1:16356-16694						NW_010577460v1:56915-62308
Empidonax traillii	NW_020955333v1:555136-557985	NW_020955194v1:6317029-6320710			NW_020955201v1:4935571-4997052
Pipra filicauda	NW_024103763.1:1113814-1116641	NW_024104403.1:68871-71457			NW_024104487.1:2982100-3047754
Pterocles gutturalis	NW_010145220v1:69-2554	NW_010147695v1:875-1394			NW_010136492v1:12386-22485
Taeniopygia guttata	chr1:100618710-100621477	chr1:102912629-102915527			chrZ:67589041-67651853

## Sheet: Fish
SPECIES	SAT1	NR0B1	SAT2	SHBG	DMRT1
Poecilia formosa	NW_006800541v1:196066-199519	NW_006800009v1:1989409-1993743	NW_006799980v1:2657577-2664180	NW_006799980v1:553123-557937	NW_006799959v1:65314-94945
Austrofundulus limnaeus	NW_013953083v1:188488-190929		NW_013952542v1:1103616-1112317	NW_013952625v1:162291-169149	NW_013953951v1:27733-81394
Salvelinus alpinus	chrLG27:1199768-1202494	chrLG2:38582522-38587347	chrLG4q_1_29:45428278-45446229	chrLG22:14399498-14413008	chrUn_NW_019946223v1:22691-29761
Etheostoma cragini	NC_048428.1:21667016-21674244	NC_048417.1:10870901-10872590	NC_048419.1:10956242-10959116	NC_048425.1:15738136-15744275	NC_048411.1:24864538-24891638
Scleropages formosus	chr24:21228847-21230919	chr1:22685414-22687138	chr13:28932199-28935156	chr13:28848370-28855173	chr6:20640155-20658744
Gadus morhua	chr23:6162649-6165678	chr20:15117679-15119553	chr7:12575524-12584201	chr17:4886730-4892363	chr6:6413367-6436602
Hippoglossus hippoglossus	NC_047164.1:13508888-13511111	NC_047171.1:17528565-17530751	NC_047164.1:14791995-14795714	NC_047168.1:10557124-10561000	NC_047159.1:1916535-1937727
Clupea harengus	chr8:278709-282864	chr21:9188692-9190685	chr18:7477530-7481239	chr18:7247084-7251390	chr7:14219624-14244172
Salmo salar	chrssa04:35206349-35208596	chrssa25:37923704-37930081	chrssa10:53015981-53039109	chrssa09:106459685-106471061	chrssa24:47925804-47975665
Labrus bergylta	NW_018114662v1:674553-678328	NW_018115090v1:42869-44869	NW_018114438v1:2446154-2453387	NW_018114438v1:568635-576629	NW_018114811v1:96234-123734
Lates calcarifer	NW_017363904v1:609456-612545	NW_017366226v1:123850-131104	NW_017365383v1:8934134-8936894	NW_017367455v1:330025-334718	NW_017367222v1:381480-410859
Stegastes partitus	NW_007577874v1:247332-252231	NW_007578318v1:223879-225171	NW_007578230v1:187956-198541	NW_007578018v1:316497-321639	NW_007577802v1:145174-179265
Notothenia coriiceps	NW_011364801v1:42954-46491	NW_011352052v1:657718-659337	NW_011332989v1:177906-185312	NW_011342353v1:302419-307293	NW_011357795v1:263680-360340
Oreochromis aureus	NW_022246274v1:42319-45235	NW_022248493v1:1543073-1544675	NW_022254698v1:1660274-1666473	NW_022255007v1:324842-328712
Oreochromis aureus	NC_052950.1:34369101-34372034	NC_052957.1:22091644-22093385	NC_052951.1:12657117-12663072	NC_052944.1:21536782-21540987	NC_052953.1:2964260-2997314
Gouania willdenowi	chr14:4041287-4043829	chr21:20647300-20649838	chr18:8038737-8046167	chr18:9716633-9721966	chr9:12449107-12482089
Periophthalmus magnuspinnatus	NC_047139.1:28642733-28644094	NC_047146.1:8211715-8213241	NC_047139.1:27771825-27773341	NC_047143.1:26904071-26905874
Haplochromis burtoni	NW_005179858v1:301392-304204	NW_005179733v1:22108-23670	NW_005179474v1:1887330-1893809	NW_005179847v1:87621-103261	NW_005179446v1:261075-300717
Cottoperca gobio	chrUn_NW_021166819v1:152996-156728	chr21:20790361-20792215	chr18:11168617-11172550	chr18:9720521-9726747	chr9:22782040-22813518
Ictalurus punctatus	chr28:17888402-17893682	chr27:17824010-17825820	chr28:18192336-18193864	chr13:2015666-2030582	chr22:8179274-8202749
Simochromis diagramma	NW_024387233.1:452944-455742	NW_024387320.1:4283033-4286446	NW_024386883.1:1073646-1078480	NW_024387038.1:406430-410046	NW_024387285.1:498198-531060
Oncorhynchus tshawytscha	chr30:36310910-36313134	chr3:70202834-70209155	chr19:12853163-12881845	chr14:28548087-28571050	chr4:334105-403727
Oncorhynchus keta	NC_050116.1:35405229-35407598	NC_050139.1:5236115-5241735	NC_050122.1:4834668-4847971	NC_050140.1:40793923-40799426	NW_023378774.1:22332-26345
Anabas testudineus	NW_020535996v1:17904517-17907766	NW_020536007v1:9110049-9111792	NW_020535989v1:5609222-5615344	NW_020535989v1:4068999-4073533	NW_020536017v1:21440838-21464822
Amphiprion ocellaris	NW_019374927v1:11224-16997	NW_019375548v1:27042-28669	NW_019375820v1:114540-118348	NW_019373045v1:113521-118944	NW_019373213v1:256501-295712
Oncorhynchus kisutch	chrLG18:68596367-68599956	chrLG2:66108916-66115892	chrLG22:10781803-10806999	chrLG18:35844132-35854493	chrLG3:705333-784016
Cyprinus carpio	chrUn_NW_017538198v1:115851-121280	chrUn_NW_017538177v1:1122109-1124286	chrUn_NW_017538489v1:24461-28588	chrUn_NW_017538446v1:489800-495603	chrUn_NW_017543034v1:152587-177632
Denticeps clupeoides	chr2:32997510-32999360	chr5:15071726-15074190	chr1:36863818-36866425	chr1:36997565-37001880	chrUn_NW_021630114v1:131996-138585
Astatotilapia calliptera	chr9:29263268-29266101	chr16:14001776-14007473	chr3:19411926-19415746	chr3:16969366-16973235	chr12:35356991-35397065
Electrophorus electricus	NW_020825969v1:1576815-1579515	NW_020826109v1:489001-491250	NW_020826152v1:573955-576710	NW_020826316v1:334017-339799	NW_020825960v1:2550406-2566532
Trematomus bernacchii	NW_022987477.1:5487760-5491329	NW_022987588.1:5669256-5670894	NW_022987705.1:3597173-3602101	NW_022987686.1:2067182-2071245	NW_022988043.1:16758487-16785489
Perca fluviatilis)	NC_053133.1:25709079-25715541	NC_053123.1:21883581-21885428	NC_053127.1:23326351-23329201	NC_053125.1:15857232-15865136	NC_053117.1:31770292-31802453
Pimephales promelas	NW_024121133.1:18676953-18678767	NW_024121188.1:8083080-8085844	NW_024121178.1:522957-525725	NW_024121965.1:1023296-1029867	NW_024121577.1:960810-989779
Archocentrus centrarchus	chr20:31894482-31897987	chr21:23610097-23611706	chr14:19926509-19932858	chr18:23205657-23209807	chrUn_NW_022060256v1:5638021-5671543
Epinephelus lanceolatus	NC_047003.1:32406296-32412170	NC_046993.1:15413319-15415369	NC_046992.1:3644350-3651983	NC_047010.1:21060644-21068849	NC_046994.1:7910064-7947496
Sparus aurata	chr19:27563754-27567208	chr9:13878510-13880322	chr13:8954930-8967087	chr10:30021888-30027363	chr5:20186116-20218707
Sinocyclocheilus grahami	NW_015505321v1:896365-898167	NW_015505199v1:1387998-1389970	NW_015505379v1:813195-818412	NW_015505238v1:1122307-1126868	NW_015505808v1:319000-352899
Carassius auratus	chr5:566043-569456	chr11:13336053-13338667	chr32:32769708-32773620	chr12:11975556-11980471	chr30:11355250-11369263
Boleophthalmus pectinirostris	NW_018357061v1:294153-302367	NW_018358718v1:309555-310885	NW_018359470v1:1088249-1091401	NW_018354516v1:259617-262340
Seriola dumerili	NW_019175553v1:540434-544595	NW_019174307v1:15899276-15901022	NW_019174704v1:6743023-6747594	NW_019174617v1:518895-523829	NW_019174448v1:1900322-1927162
Syngnathus acus	NC_051099.1:7123797-7125106	NC_051105.1:3019154-3021542	NC_051099.1:7710863-7715840	NC_051095.1:997995-1001300	NC_051094.1:4498088-4510407
Xiphophorus hellerii	NC_045682.1:11568488-11570318	NC_045678.1:12019530-12022662	NC_045682.1:13093724-13095740	NC_045685.1:13625650-13630452
Poecilia reticulata	chrLG20:25926995-25932653	chrLG2:17760218-17766210	chrLG18:8581656-8584951	chrLG18:10553348-10559878	chrLG9:32318907-32347928
Sebastes umbrosus	NC_051289.1:2127997-2135709	NC_051281.1:20988410-20991548	NC_051285.1:27173389-27182345	NC_051290.1:15631871-15637944	NC_051276.1:25522837-25554500
Sinocyclocheilus rhinocerous	NW_015653490v1:484307-485803	NW_015628268v1:111658-113666	NW_015664685v1:103397-107291	NW_015629505v1:30592-36106	NW_015662082v1:126938-147738
Parambassis ranga	chr20:3122415-4141834	chr21:1575761-1577040	chr14:13108564-13110929	chr18:9125081-9127697	chr9:20532693-20551992
Oryzias melastigma)	NC_050531.1:25868847-25870902	NC_050532.1:3840600-3842163	NC_050525.1:12536813-12540368	NC_050529.1:14152942-14158604	NC_050520.1:3821370-3859183
Paralichthys olivaceus	NW_017860090v1:38701-41144	NW_017860693v1:5032-7170	NW_017859651v1:4465185-4468570	NW_017860852v1:10598-14797	NW_017860076v1:10040-30314
Oryzias latipes	chr20:2837152-2840015		chr18:17447862-17457401	chr18:14641563-14648408
Salarias fasciatus	chr10:11820348-11822211	chr16:29920992-29941374	chr3:9391670-9396517	chr3:8415512-8418432	chr12:31116955-31125667
Salvelinus namaycush	NC_052339.1:21559465-21562700	NC_052313.1:55914836-55915933	NC_052327.1:8276609-8298872	NC_052342.1:8119338-8127242	NW_024061354.1:57134-139699
Larimichthys crocea	chrXXIII:345693-381964	chrXVIII:20403870-20405671	chrXXII:9128784-9130347	chrXIV:4023571-4027029	chrIII:47496445-47525313
Micropterus salmoides	NW_024040040.1:50717055-50722214	NW_024040596.1:19426046-19427701	NW_024044681.1:26459641-26461759	NW_024041150.1:25148709-25156767	NW_024044459.1:11584930-11627216
Echeneis naucrates	chr20:978223-980306	chr21:5487638-5489275	chr14:13035377-13039255	chr18:5472811-5477415	chr9:22390985-22413117
Cyclopterus lumpus	NC_046985.1:4046601-4049867	NC_046986.1:7251560-7254678	NC_046979.1:14337864-14341664	NC_046983.1:8342745-8346765	NC_046974.1:4508160-4528030
Neolamprologus brichardi	NW_006272208v1:290377-293171	NW_006272014v1:2523435-2524944	NW_006272083v1:472577-479501		NW_006272053v1:4289992-4325031
Kryptolebias marmoratus	NC_051450.1:22637689-22639474	NC_051435.1:16106929-16108665	NC_051442.1:14825909-14829170	NC_051436.1:10633898-10639915
Astyanax mexicanus	chr3:21782007-21786444	chrUn_NW_019172925v1:3412850-3416821	chr16:31158139-31164694	chr6:16141692-16159709	chrUn_NW_019172824v1:554038-596973
Chanos chanos	chr3:4859219-4861503	chr4:15441439-15442568	chr15:750943-754916	chr5:37666956-37671520	chr1:45111815-45131215
Xiphophorus couchianus	chr21:1302941-1761293	chr7:11311158-11313884	chr11:19459138-19461177	chr14:12233210-12238290
Fundulus heteroclitus	NW_012224870v1:2435368-2436975	NW_012234281v1:1739963-1741512	NW_012234309v1:897813-901909	NW_012234406v1:893280-901836	NW_012234506v1:633119-709130
Fundulus heteroclitus	NC_046371.1:23062354-23063757	NC_046367.1:19292987-19294576	NC_046371.1:25092628-25097299	NC_046374.1:17108443-17117638	NC_046372.1:27311452-27359370
Notolabrus celidotus	NC_048276.1:11870166-11871721	NC_048281.1:25621975-25624283	NC_048276.1:13571393-13574774	NC_048294.1:11817011-11822599	NC_048280.1:4869383-4917616
Oreochromis niloticus	chrLG9:5838843-5841799	chrLG16:21892572-21894229	chrLG10:11439333-11445129	chrLG3:17608293-17612187	chrLG12:35758303-35796109
Pundamilia nyererei	NW_005187762v1:289429-292253	NW_005187456v1:2406604-2408167	NW_005187552v1:1268100-1275019		NW_005187439v1:252388-285910
Pungitius pungitius	NW_023616475.1:975954-978713	NW_023616470.1:12243994-12245636	NW_023616461.1:7880568-7882775	NW_023616466.1:28353123-28356936	NW_023616467.1:19667475-19681663
Esox lucius	chrLG21:6437657-6440252	chrLG16:1259237-1261857	chrLG24:13784593-13788653	chrLG24:9642210-9649692	chrLG13:616500-658208
Paramormyrops kingsleyae	NW_019715713v1:239863-241757	NW_019711866v1:1763248-1764853	NW_019712765v1:1164108-1166507	NW_019713509v1:267159-273426	NW_019713784v1:564-2007
Etheostoma spectabile	NC_045745.1:25305567-25306967	NC_045743.1:4512357-4514139	NC_045745.1:26672042-26674976	NW_022605591.1:831173-836320
Sphaeramia orbicularis	chr14:28509985-28512008	chr21:31679880-31682090	chr14:26842767-26862766	chr18:33289548-33303888
Hippoglossus stenolepis	NC_048945.1:19686809-19689919	NC_048939.1:16949987-16952156	NC_048949.1:4525430-4530796	NC_048949.1:6014370-6019889	NC_048935.1:24888136-24910044
Sander lucioperca	NC_050186.1:6658304-6667688	NC_050180.1:17086258-17087994	NC_050185.1:11645587-11650080	NC_050189.1:13926322-13933032	NC_050174.1:30358761-30393323
Myripristis murdjan	chr20:4885554-4890513	chr21:20645971-20647891	chr18:13253017-13261438	chr18:15192977-15216244	chr9:31566759-31599888
Gymnodraco acuticeps	NW_022992223.1:200278-203770	NW_022990016.1:516128-517799	NW_022991340.1:965834-969237	NW_022990484.1:1092104-1098281	NW_022990125.1:560926-601561
Thalassophryne amazonica	NC_047111.1:78687611-78691092	NC_047116.1:16310661-16318383	NC_047111.1:84587727-84626926	NC_047125.1:13505554-13514137	NC_047107.1:88175649-88270266
Oncorhynchus mykiss	chr15:10927227-10929873	chr3:74408515-74414199	chr2:35892568-35918042	chr24:10650111-10660179	chr6:506888-541690
Oncorhynchus mykiss	NC_048579.1:14251426-14254054	NC_048586.1:22233264-22235783	NC_048566.1:50982958-51008552	NC_048573.1:25635682-25641068	NC_048570.1:1419387-1497504
Pygocentrus nattereri	NW_016244792v1:91725-96236	NW_016243789v1:1903846-1906482	NW_016243917v1:337493-345814	NW_016243758v1:4310302-4317125	NW_016243794v1:805440-832507
Nematolebias whitei	NW_023618565.1:33047429-33049441	NW_023618558.1:27819182-27820806	NW_023618559.1:38326322-38335315	NW_023618546.1:29604555-29610689	NW_023618553.1:3956840-3994285
Salmo trutta	chr6:13242788-13245452	chr24:37649047-37654706	chr7:31366603-31390068	chr13:57518598-57529226	chr27:46326617-46386964
Poecilia latipinna	NW_015115289v1:63225-66678	NW_015113008v1:43445-66776	NW_015113280v1:44560-47096	NW_015112776v1:402790-407560	NW_015113354v1:45306-81237
Cyprinodon variegatus	NW_015150494v1:218502-221435	NW_015150734v1:444828-446238	NW_015151012v1:371748-377990	NW_015150646v1:925779-932925	NW_015151082v1:196537-229982
Poecilia mexicana	NW_015095536v1:86004-89412	NW_015094815v1:396322-398953	NW_015095178v1:44260-72160	NW_015094853v1:297340-301992
Betta splendens	chr14:8393775-8395253	chr21:6059687-6061251	chr14:7584082-7586096	chr2:23522352-23525743	chr9:28849547-28864704
Oncorhynchus nerka	chrUn_NW_021797897v1:116049-118700	chrUn_NW_021789956v1:131487-138115	chrLG9a:42342132-42353692	chrLG14:34108117-34117148	chrLG27:1524-45899
Oncorhynchus nerka	chrUn_NW_021797897v1:116049-118700	chrUn_NW_021789956v1:131487-138115	chrLG9a:42342132-42353691	chrLG14:34108117-34117148	chrLG27:1524-45899
Pseudochaenichthys georgianus	NC_047522.1:18124736-18128544	NC_047523.1:32317137-32318909	NC_047516.1:22717161-22719852	NC_047520.1:6987485-6994122	NC_047511.1:13189213-13223014
Xiphophorus maculatus	chr4:11620958-11819442	chr7:11516439-11518372	chr11:20369789-20371809	chr14:12810656-12815748	chr12:3577454-3609339
Sinocyclocheilus anshuiensis	NW_015547254v1:1100641-1102819	NW_015542345v1:1402413-1404531	NW_015539835v1:1108396-1113014	NW_015552606v1:762421-768220	NW_015546086v1:373095-410158
Acanthochromis polyacanthus	NW_019029204v1:815592-817334	NW_019030120v1:106659-108269	NW_019029697v1:154579-165986	NW_019030121v1:197649-204440	NW_019029329v1:516529-553654
Pangasianodon hypophthalmus	NW_020824205v1:138268-144668	NW_020824255v1:564018-566727	NW_020824222v1:6775553-6784282	NW_020824200v1:1973342-1985451	NW_020824215v1:7599459-7619908
Pangasianodon hypophthalmus	NC_047621.1:353579-356637	NC_047619.1:14535074-14537654	NC_047621.1:128554-132447	NC_047606.1:23329027-23341041	NC_047618.1:11299124-11308615
Morone saxatilis	NW_023339650.1:20766736-20769171	NW_023340095.1:17764412-17765783	NW_023339763.1:15962392-15966094	NW_023339984.1:10060233-10065083	NW_023339718.1:18772540-18803048
Monopterus albus	NW_018127919v1:460197-461539	NW_018127979v1:2231140-2232859	NW_018127919v1:1690728-1693912	NW_018128264v1:166620-172383
Xiphias gladius	NC_053404.1:21307328-21311056	NC_053415.1:18947731-18949501	NC_053416.1:17733583-17738589	NC_053411.1:10957604-10963448	NC_053418.1:4408430-4440488
Colossoma macropomum	NW_023494794.1:29961675-29964539	NW_023495660.1:323741-344896	NW_023494794.1:30703244-30713462	NW_023494790.1:16292545-16299932	NW_023494806.1:22458023-22488703
Gasterosteus aculeatus aculeatus	NC_053232.1:16938115-16940788	NC_053227.1:6917193-6918786	NC_053218.1:20997236-20999810	NC_053218.1:4773608-4778309	NC_053224.1:18855486-18875187
Hippocampus comes	NW_017804981v1:250242-252419	NW_017806074v1:951142-954012	NW_017805039v1:1067430-1077043	NW_017808403v1:846403-852664	NW_017805121v1:98585-105259
Cynoglossus semilaevis	chr3:9772772-9774894	chr16:4687027-4688989	chr19:17074093-17076460	chr1:25651031-25655138	chrZ:8547159-8568353
Takifugu rubripes	chr10:11189201-11190776	chr1:16456139-16457393	chr15:13390172-13392111	chr8:17267969-17270641	chr21:16308981-16321340
Scophthalmus maximus	NC_049708.1:14787284-14792363	NC_049701.1:16203538-16208215	NC_049691.1:13220928-13223363	NC_049689.1:6051609-6056787	NC_049696.1:23199705-23226938
Nothobranchius furzeri	chrsgr08:57036258-57038244	chrsgr14:22733228-22734998	chrsgr11:16406342-16412367	chrsgr04:36454482-36460238	chrsgr11:5556792-5618420
Cyprinodon tularosa	NW_024039267.1:507059-509983	NW_024039218.1:43839-45360	NW_024039518.1:1046147-1053580	NW_024038751.1:327854-334820	NW_024039124.1:704377-741452
Anarrhichthys ocellatus	NW_022282779v1:3264-6732	NW_022280077v1:429608-431550	NW_022280048v1:1349271-1352462	NW_022280041v1:5517342-5522711	NW_022280803v1:2986-15767
Tachysurus fulvidraco	NW_020847814v1:171217-173703	NW_020848000v1:950971-953118	NW_020848182v1:1773541-1780175	NW_020847965v1:660873-677444
Perca flavescens	chr22:24588544-24597130	chr11:16238043-16239895	chr19:17170120-17189909	chr19:19134948-19144670
Acanthopagrus latus	NC_051057.1:23023119-23026297	NC_051047.1:10198527-10200285	NC_051051.1:7400463-7404392	NC_051048.1:17892357-17898109	NC_051043.1:16631080-16657561
Seriola lalandi dorsalis	NW_019525533v1:473288-476879	NW_019523482v1:394516-396351	NW_019524809v1:2131872-2137148	NW_019525211v1:61672-66302	NW_019525077v1:600456-627647
Maylandia zebra	chrLG9:20390782-20393588	chrLG16:12543470-12545032	chrLG10:11483410-11491174	chrLG3:22139110-22142977	chrLG12:32204911-32241137
Danio rerio	chr24:21973880-21978440	chr11:29682909-29685824	chr5:53824938-53863395	chr12_NW_018394839v1_alt:453093-466471	chr5:44944778-44946324
Danio rerio	CP068739.1:3994906-4005335	CP068745.1:29402408-29405315	CP068741.1:20369629-20376122	CP068746.1:22361829-22375186	CP068739.1:44286009-44332474
Mastacembelus armatus	NW_020535883v1:1851407-1855511	NW_020535966v1:17952612-17954162	NW_020535942v1:10388699-10391385	NW_020535858v1:12601994-12607920

## Sheet: OTHER VERTEBRATES
SPECIES	SAT1	NR0B1	SAT2	SHBG	DMRT1
Chelonoidis abingdonii	NW_022645743.1:869987-873577	NW_022641632.1:144036-154975	NW_022642344.1:129920-150797	NW_022643522.1:276682-282647	NW_022645477.1:2093229-2183908
Xenopus laevis	chr2S:31738004-31742028	chr2L:38353273-38359066	chr3L:142913708-142928127	chrUn_NW_016694811v1:8097422-8113797	chr1L:126874738-126931050
Alligator mississippiensis	NW_017711692v1:2190611-2193878	NW_017709480v1:5929820-6248622		NW_017711995v1:75889-80160	NW_017713772v1:29635249-29729251
Crocodylus porosus	NW_017728906v1:58844634-58847866	NW_017728906v1:54363909-54366832			NW_017728950v1:61362673-61480472
Protobothrops mucrosquamatus	NW_015386293v1:381537-387504	NW_015386464v1:549510-552315		NW_015388420v1:14441-22451	NW_015386955v1:433960-506132
Python bivittatus	NW_006535381v1:39955-45812	NW_006534139v1:68407-71404		NW_006534202v1:106432-114064	NW_006532343v1:110085-174737
Pogona vitticeps	NW_018150799v1:345612-351222	NW_018150827v1:2454202-2457688	NW_018150954v1:805807-811276	NW_018151245v1:742620-752690	NW_018151103v1:360937-443434
Alligator sinensis	NW_005842773v1:737812-740921	NW_005841959v1:699555-706559	NW_005843097v1:258861-263124	NW_005843422v1:83237-87262	NW_005842041v1:808437-874348
Pelodiscus sinensis	NW_005852023v1:647093-650021	NW_005871014v1:429521-432384		NW_005851936v1:857713-872436	NW_005871012v1:5129691-5236265
Latimeria chalumnae	NW_005821874v1:126539-131480	NW_005820717v1:249781-254761		NW_005819430v1:576310-586506	NW_005819686v1:691808-848119
Thamnophis sirtalis	NW_013660878v1:35930-42166	NW_013660718v1:95177-98683		NW_013659018v1:33181-42535	NW_013658198v1:163531-235767
Podarcis muralis	chr4:65211900-65216829	chr4:63202180-63206708	chr13:53590526-53605132	chr13:52148195-52167208	chr17:29126508-29188656
Bufo bufo	NC_053391.1:137558191-137565854	NC_053391.1:154993662-154999205		NC_053392.1:120303876-120318778	NC_053390.1:353914638-354121002
Pantherophis guttatus	NW_023010828.1:2407257-2413861	NW_023010748.1:2963974-2966931			NW_023010706.1:15479435-15555786
Pseudonaja textilis	NW_020769376v1:5921958-5948259	NW_020769390v1:2212245-2215073	NW_020769635v1:75755-80229	NW_020769558v1:180993-189912	NW_020769331v1:3194247-3260024
Callorhinchus milii	NW_006890234v1:1206-6979	NW_006890194v1:1246448-1253700			NW_006890077v1:7191648-7277216
Rana temporaria	NC_053490.1:428010025-428015371	NC_053490.1:415612985-415619002	NC_053491.1:488634991-488665273	NC_053492.1:112741820-112804085	NC_053489.1:289497647-289680186
Anguilla anguilla)	NC_049209.1:17444617-17447765	NC_049215.1:32642370-32644031	NC_049209.1:28789168-28795021	NC_049203.1:57333877-57340180	NC_049214.1:6200525-6213265
Gavialis gangeticus	NW_017729032v1:186850020-186864478	NW_017729032v1:192672383-192675440			NW_017729024v1:123631116-123752080
Gopherus evgoodei	chr1:144035975-144039552	chr1:148310975-148323250		chrUn_NW_022060107v1:247149-258468	chr6:41963004-42056697
Polypterus senegalus	NW_024377347.1:14605-18316	NC_053155.1:159469798-159473250	NC_053156.1:41427000-41460892	NC_053156.1:39564928-39601806	NC_053160.1:48016326-48195034
Anolis carolinensis	chr3:125678238-125685691	chr3:129401057-129408656	chrUn_NW_003339207v1:1280-7298	chrUn_NW_003339207v1:149292-202439	chr2:50313573-50389432
Chelonia mydas	NW_006688931v1:1649235-1652226	NW_006640624v1:4122909-4227814	NW_006578683v1:49171-51101		NW_006651178v1:9977791-10065401
Nanorana parkeri	NW_017307865v1:186989-193176	NW_017308589v1:156589-162841			NW_017306666v1:193451-252823
Dermochelys coriacea	NC_050068.1:142740553-142746018	NC_050068.1:146964520-146969287	NC_050095.1:1145108-1148721	NC_050095.1:1651197-1660390	NC_050072.1:101983890-102074933
Notechis scutatus	NW_020716678v1:2345793-2357379	NW_020716743v1:1931125-1933968		NW_020723277v1:361-7486	NW_020716612v1:33826728-33894622
Trachemys scripta elegans	NC_048298.1:207031481-207035118	NC_048298.1:203079744-203087007	NC_048321.1:100179-102562		NC_048303.1:90102357-90185752
Erpetoichthys calabaricus	chr4:45220618-45224636	chr4_NW_021316608v1_random:66889-70207	chr3:273605240-273657925		chr7:149925696-150034268
Mauremys reevesii)	NC_052623.1:145720970-145724406	NC_052623.1:149720596-149731370		NC_052636.1:14059489-14070527	NC_052628.1:89575892-89659328
Gekko japonicus	NW_015168688v1:538308-543194	NW_015174370v1:63450-66483	NW_015172014v1:919698-926753	NW_015160901v1:171381-197370	NW_015161404v1:784891-865296
Scyliorhinus canicula	NC_052162.1:89230271-89258614	NC_052152.1:78902411-78924250		NC_052174.1:14862061-14877768	NC_052153.1:65159669-65323961
Lepisosteus oculatus	chrLG3:4357697-4373522	chrLG17:25152238-25153794	chrLG2:61082349-61089049	chrLG2:60703009-60713314	chrLG2:47293830-47331141
Acipenser ruthenus	NC_048330.1:2702381-2719084	NC_048330.1:51270809-51272869	NC_048378.1:2816702-2822618		NC_048324.1:14045631-14082416
Amblyraja radiata	NC_045969.1:28198184-28221240	NC_045969.1:43248981-43257106			NC_045958.1:51219811-51291262
Terrapene carolina triunguis	NW_020664373.1:15833176-15836179	NW_020664374.1:26168741-26172012		NW_020699312.1:9549-14486	NW_020664464.1:14872906-14950474
Crotalus tigris	NW_024096495.1:689053-720693	NW_024096545.1:151561-156235	NW_024096569.1:259729-263902	NW_024096569.1:1067410-1076932	NW_024097531.1:441096-516834
Microcaecilia unicolor)	chr4:352009305-352016534	chr4:375317826-375330841	chr14:15598993-15606945	chr14:18004192-18016797	chr2:239531624-239858986
Xenopus tropicalis	chr2:43099364-43103843	chr2:39323393-39327233	chr3:152916063-152922576	chr3:153698815-153722906	chr1:128700431-128748484
Rhinatrema bivittatum	chr5:229069748-229074292	chr5:199596332-199613436	chr16:19755049-19757959	chr16:18248333-18260499	chr1:524136294-524457209
Zootoca vivipara	NC_048609.1:60328824-60333448	NC_048609.1:58288679-58292845		NC_048617.1:44797317-44815014	NC_048620.1:1136450-1188439
Chrysemys picta bellii	NW_007281380.1:3420804-3424421	NC_024218.1:45332644-45337037			NC_024223.1:11237435-11322415
Rhincodon typus	NW_018079134v1:92636-113519	NW_018065062v1:54629-72662			NW_018062306v1:23596-108413
